# Supplementary material for: Physalin A exerts anti-tumor activity in non-small cell lung cancer cell lines by suppressing JAK/STAT3 signaling
Source: PubMed Central journal article supplement (PMC4891052; doi:10.18632/oncotarget.7051), 2016-01-28
Supplement: oncotarget-07-9462-s001.pdf [file oncotarget-07-9462-s001.pdf]

## Physalin A exerts anti-tumor activity in non-small cell lung cancer cell lines by suppressing JAK/STAT3 signaling

### Supplementary Materials

A

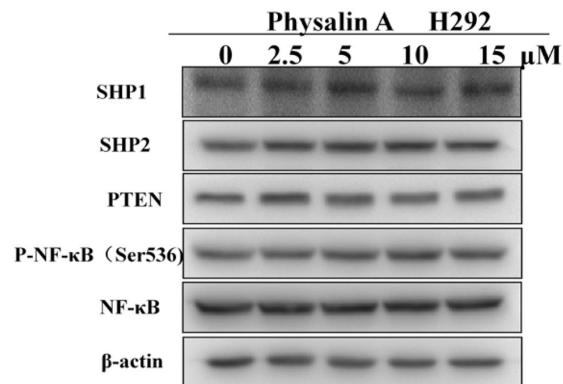

B

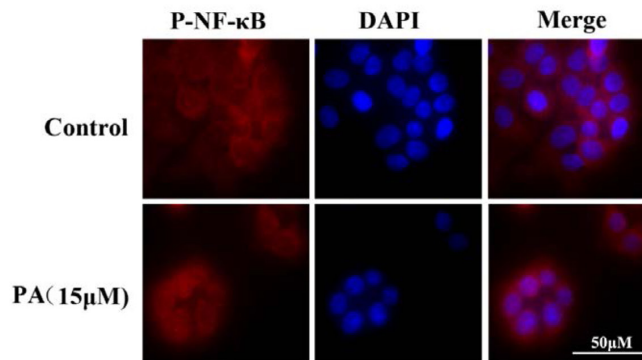

C

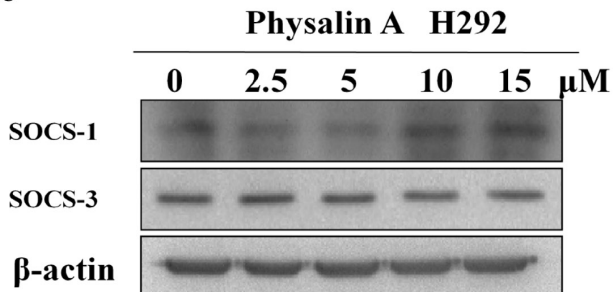

**Supplementary Figure S1: Effects of Physalin A on protein expression of protein tyrosine phosphatases, NF-κB, and SOCS in H292 cells.** (A, C) H292 cells were treated with the indicated concentrations of physalin A after which the protein expression of protein tyrosine phosphatases, NF-κB, p-NF-κB and SOCS was determined using Western blot analysis. (B) After H292 cells were treated with 15 μM physalin A for 4 h, p-NF-κB subcellular localization was assessed by immunofluorescence analysis.
